# Supplementary material for: Management of non-muscle-invasive bladder cancer: quality of clinical practice guidelines and variations in recommendations
Source: PubMed Central journal article supplement (PMC6836507; doi:10.1186/s12885-019-6304-y), 2019-11-06
Supplement: 12885_2019_6304_MOESM1_ESM.pdf [file 12885_2019_6304_MOESM1_ESM.pdf]

#1 non-muscle[Title/Abstract] OR nonmuscle[Title/Abstract] OR non muscle[Title/Abstract] OR without[Title/Abstract]  
#2 #1 AND invasive[Title/Abstract]  
#3 non-muscle-invasive[Title/Abstract] OR low risk[Title/Abstract] OR superficial[Title/Abstract] OR early[Title/Abstract]  
OR carcinoma in situ[Title/Abstract] OR Tis[Title/Abstract] OR Ta[Title/Abstract] OR T1[Title/Abstract]  
#4 #2 OR #3  
#5 Urinary Bladder Neoplasms[Mesh Terms]  
#6 Urinary Bladder[Mesh Terms] OR bladder\*[Title/Abstract] OR urin\*[Title/Abstract] OR urotheli\*[Title/Abstract] OR  
urethra\*[Title/Abstract] OR ureter\*[Title/Abstract] OR ureteral\*[Title/Abstract]  
#7 Neoplasms[Mesh Terms] OR cancer\*[Title/Abstract] OR tumor\*[Title/Abstract] OR tumour\*[Title/Abstract] OR  
neoplas\*[Title/Abstract] OR carci\*[Title/Abstract] OR malig\*[Title/Abstract] OR adenoma\*[Title/Abstract] OR  
adenocarci\*[Title/Abstract] OR squamous\*[Title/Abstract] OR transitional\*[Title/Abstract]  
#8 #6 AND #7  
#9 #5 OR #8  
#10 NMIBC[Title/Abstract] OR non-muscle-invasive bladder cancer[Title/Abstract] OR non-muscle invasive bladder  
cancer[Title/Abstract] OR Ta bladder cancer[Title/Abstract] OR T1 bladder cancer[Title/Abstract] OR  
Ta urothelial carcinoma of the urinary bladder[Title/Abstract] OR  
T1 urothelial carcinoma of the urinary bladder[Title/Abstract] OR Tis bladder cancer[Title/Abstract] OR Tis urothelial  
carcinoma of the urinary bladder[Title/Abstract] OR superficial bladder carcinoma[Title/Abstract] OR superficial  
bladder cancer[Title/Abstract]  
#11 #4 AND #9  
#12 #10 OR #11  
#13 Practice Guidelines as Topic[Mesh Terms] OR Practice Guideline[Publication Type] OR Guideline[Publication Type]  
OR guideline\*[Title/Abstract] OR guidance\*[Title/Abstract] OR recommendation\*[Title/Abstract] OR  
CPG\*[Title/Abstract]  
#14 #12 AND #13
