# Supplementary material for: Management of non-muscle-invasive bladder cancer: quality of clinical practice guidelines and variations in recommendations
Source: PubMed Central journal article supplement (PMC6836507; doi:10.1186/s12885-019-6304-y), 2019-11-06

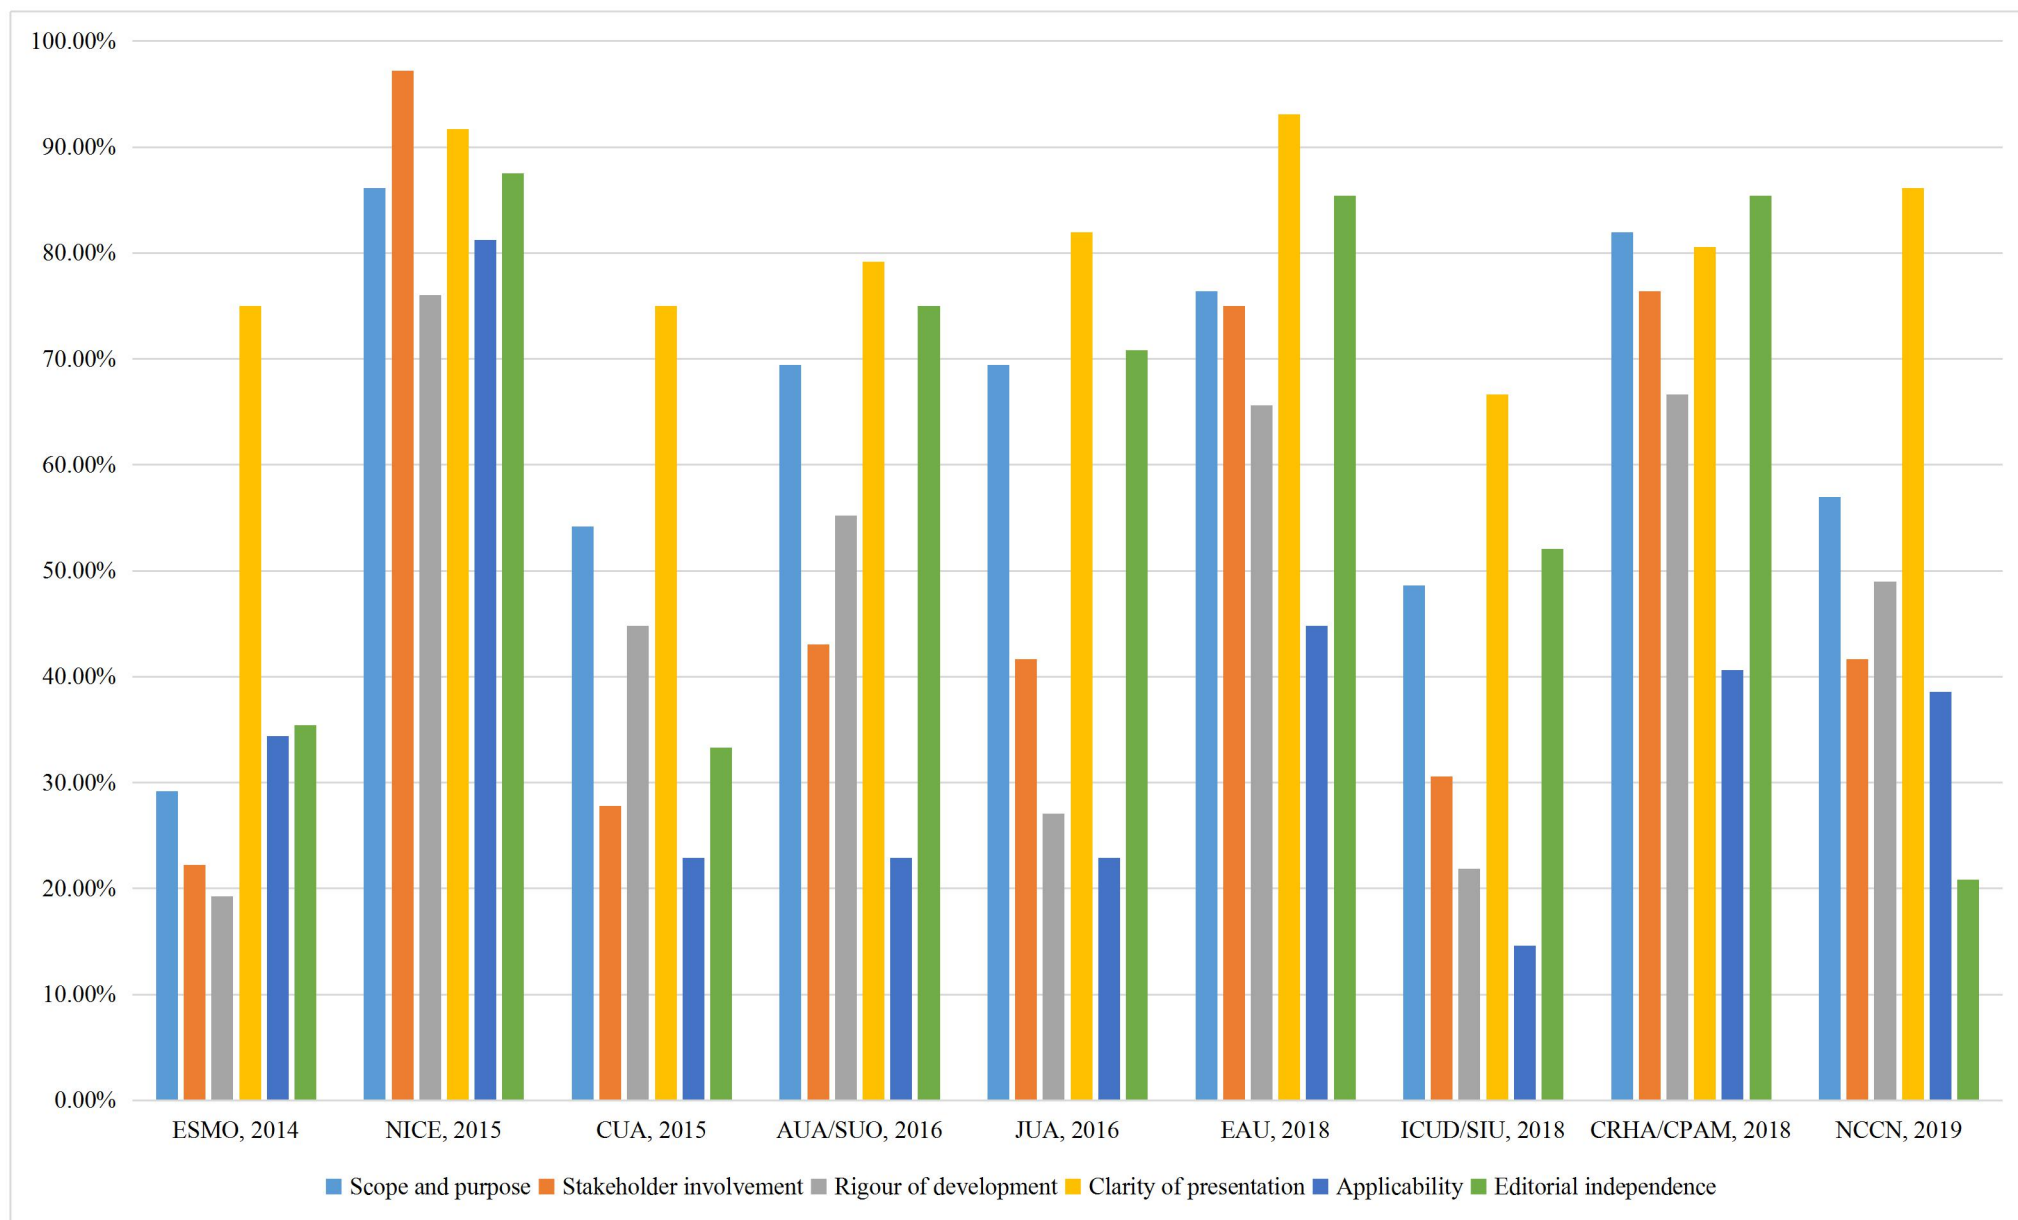

Supplement: 12885_2019_6304_MOESM4_ESM.pdf [file 12885_2019_6304_MOESM4_ESM.pdf]
